# Supplementary material for: Engineering Saccharomyces cerevisiae for co-utilization of d-galacturonic acid and d-glucose from citrus peel waste
Source: PubMed Central journal article supplement (PMC6265301; doi:10.1038/s41467-018-07589-w), 2018-11-29
Supplement: 41467_2018_7589_MOESM2_ESM.pdf [file 41467_2018_7589_MOESM2_ESM.pdf]

## Description of Additional Supplementary Files

### Supplementary Data 1

**Description:** Supplementary sequence information for fungal D-galacturonic acid utilization pathway enzymes and GAT-1 homologues sequence codon optimized for expression in *S. cerevisiae* using the IDT codon optimization tool <https://www.idtdna.com/CodonOpt> and synthesized by IDT.

### Supplementary Data 2

**Description:** Sequence information for promoters, terminators and spacers used for expression cassettes in *S. cerevisiae* as described in Lee, M.E et al.

### Supplementary Data 3

**Description:** Primers for cloning transporters in *Neurospora* complementation strains.
